# Supplementary material for: Coordination Polymers based on the Neutral Ditopic Ligand (C6H4PO(OCH3)2)2 Involving some f‐Block Elements
Source: PubMed Central journal article supplement — Z Anorg Allg Chem. 2018 Jan 17;644(3):149–54. doi: 10.1002/zaac.201700424 (PMC5888180; doi:10.1002/zaac.201700424), 2018-01-17
Supplement: ZAAC-644-149-s001.pdf [file ZAAC-644-149-s001.pdf]

**SUPPORTING INFORMATION**

**Title:** Coordination Polymers based on the Neutral Ditopic Ligand (C<sub>6</sub>H<sub>4</sub>PO(OCH<sub>3</sub>)<sub>2</sub>)<sub>2</sub> Involving some f-Block Elements

**Author(s):** K. Krekić, E. Käkel, D. Klintuch, D. Bloß, R. Pietschnig\*

**Ref. No.:** z201700424

Supporting information for:

**Coordination polymers based on the neutral ditopic ligand  $(C_6H_4PO(OCH_3)_2)_2$  involving some f-Block elements**

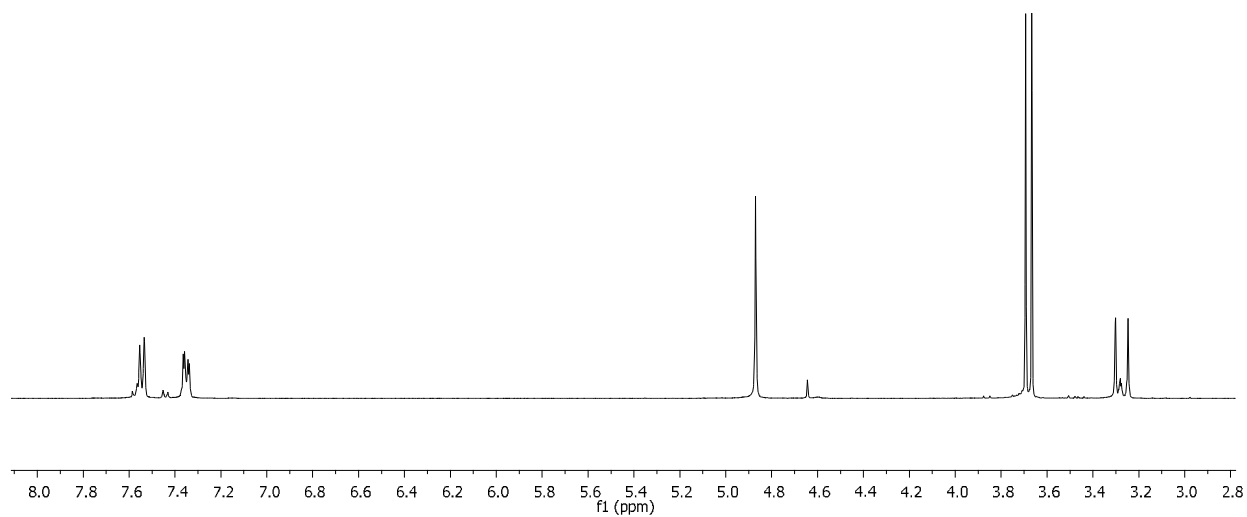

Figure s1.  $^1H$  NMR spectra of **L** in MeOH-d4 solution.

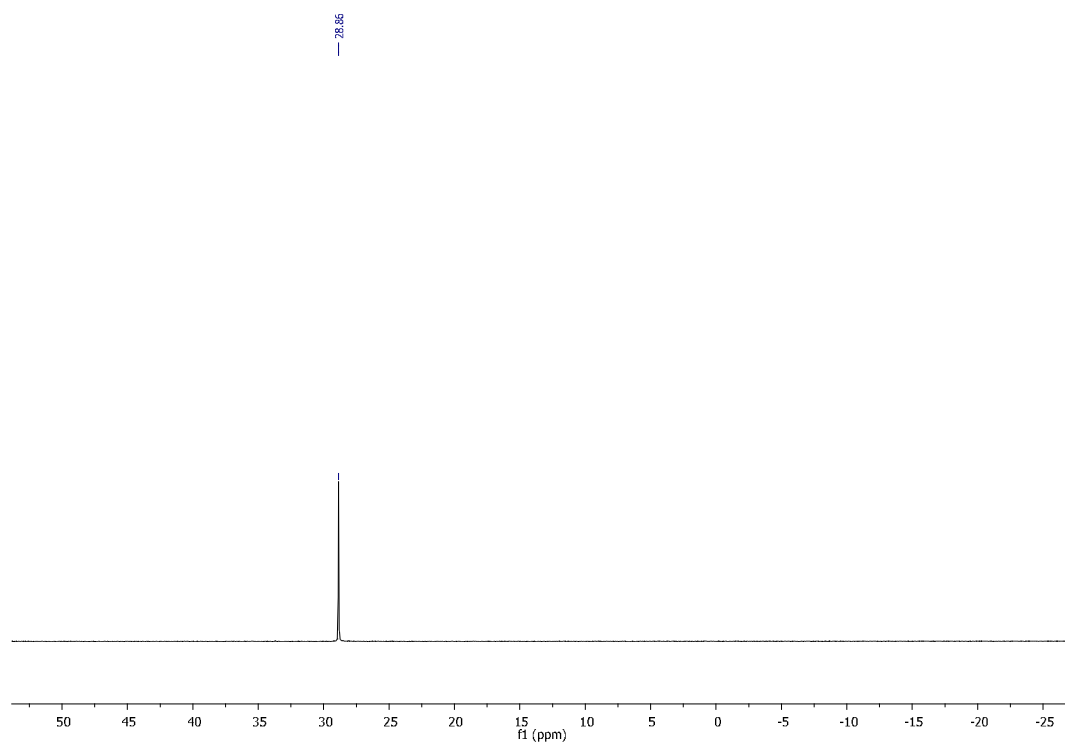

Figure s2.  $^{31}P$  NMR spectra of **L** in MeOH-d4 solution.

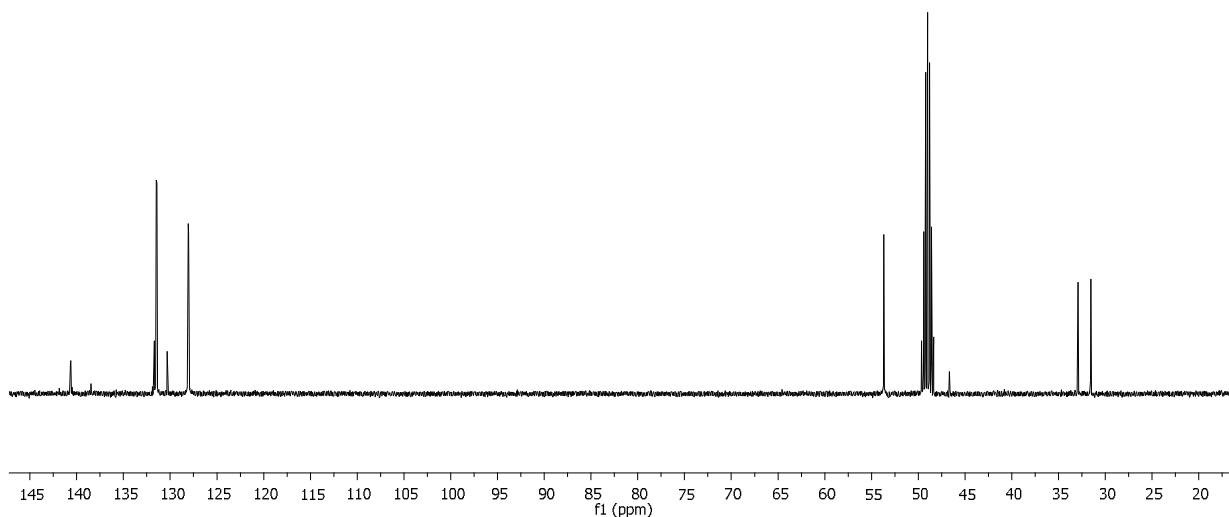

Figure s3.  $^{13}\text{C}$  NMR spectra of **L** in MeOH- $d_4$  solution.

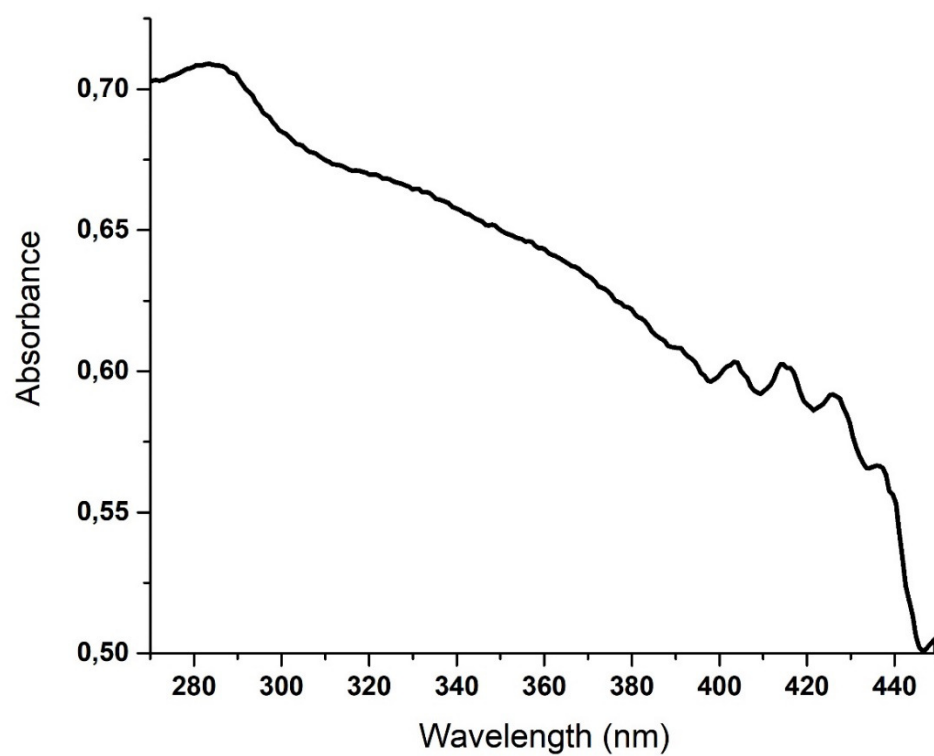

Figure s4. Solid state absorption spectra of **1f**.

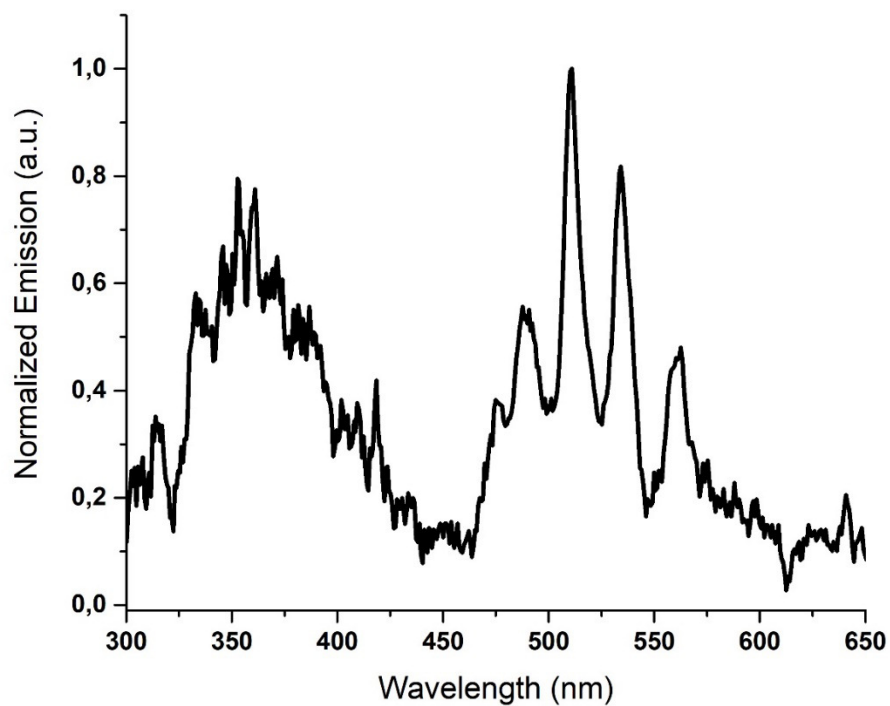

Figure s5. Solid state emission spectra of **1f**. Excitation at 283 nm.

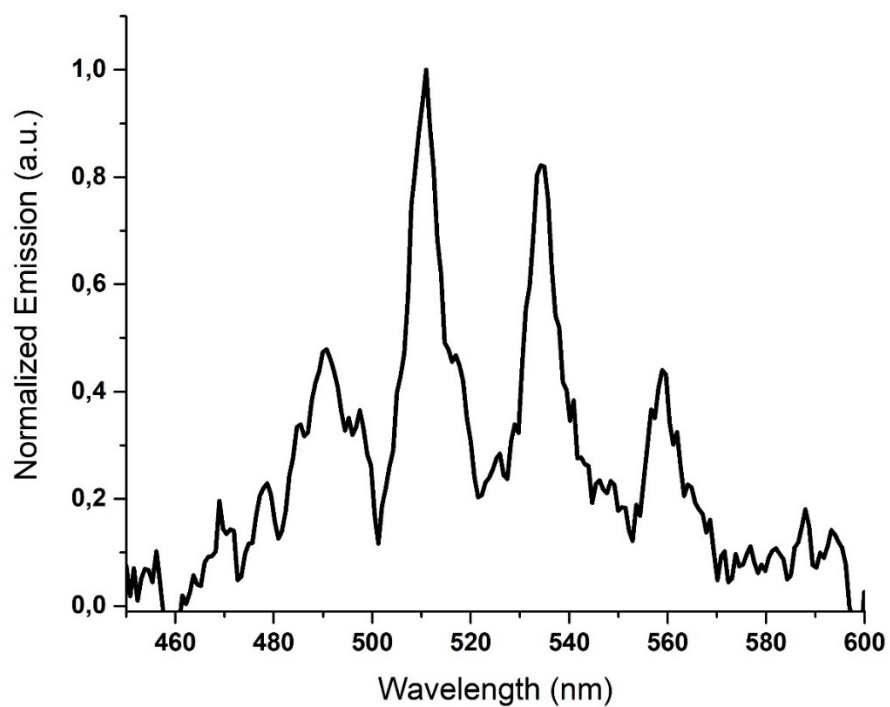

Figure s6. Solid state emission spectra of **1f**. Excitation at 415 nm.
